# Supplementary material
Source: PubMed Central journal article supplement (PMC3039334)
Supplement: supp_M110.167817_jbc.M110.167817-1.pdf [file supp_M110.167817_jbc.M110.167817-1.pdf]

Suppl. Figure S1

**Supplementary Figure S1. Effect of miR-10a and -10b overexpression on the expression of neural differentiation markers.** (A-D) RT-qPCR analysis of the mRNA levels for *NTRK2* (A), *RET* (B), *GAP43* (C) and *ENO2* (D) after transfection of pre-miR-10a and -10b as indicated. The graph shows expression levels relative to that of cells transfected with NC-pre-miR (mean  $\pm$  SD of a triplicate experiment). (E and F). Western blot of Tyrosine Hydroxylase (TH, E) and neurofilament NEFM protein (F) expression after pre-miR-10a, -10b and NC-pre-miR transfection of SH-SY5Y cells. The blot was reprobbed with actin beta antibodies as loading control.

## SFRS1 3'UTR

| uuaa ga                    |                                    |
|----------------------------|------------------------------------|
| 3'-GUGU GCCUAUGUCCCAU 5'   |                                    |
| :    :  :       :          | hsa-miR-10a                        |
| TTGGTGTACATGTGGGTACAGGGTGT | 1769 Homo sapiens SFRS1            |
| TTGGTGTACATGTGGGTACAGGGTGT | 1689 Pan troglodytes (chimp)       |
| TTGGTGTACATGTGGGTACAGGGTGT | 1670 Pongo abellii (orangutan)     |
| TTGGTGTACATGTGGGTACAGGGTGT | 1391 Macaca mulatta (macaque)      |
| TTGGTGTACATGTGGGTAGAGGGTGT | 1778 Callithrix jacchus (marmoset) |
| TTGGTGTACATGTGGGTACAGGGTGT | 1768 Equus caballus (horse)        |
| TTGGTGTACATGTGGGTACAGGGTGT | 1648 Bos taurus (cow)              |
| TTGGTGTACATGTGGGTACAGGGTGT | 1737 Canis familiaris (dog)        |
| TTGGTGTACTTGTGGGTACAGGGTGT | 1654 Sus scrofa (pig)              |
| TTGGTGTACATGTGGGTACAGGGTGT | 2514 Rattus norvegicus (rat)       |
| TTGGTGTACATGTGGGTACAGGGTGT | 1914 Mus musculus (mouse)          |

  

| uuaa aag                   |                                    |
|----------------------------|------------------------------------|
| 3'-GUGU GCC AUGUCCCAU 5'   |                                    |
| :    :        :            | hsa-miR-10b                        |
| TTGGTGTACATGTGGGTACAGGGTGT | 1769 Homo sapiens SFRS1            |
| TTGGTGTACATGTGGGTACAGGGTGT | 1689 Pan troglodytes (chimp)       |
| TTGGTGTACATGTGGGTACAGGGTGT | 1670 Pongo abellii (orangutan)     |
| TTGGTGTACATGTGGGTACAGGGTGT | 1391 Macaca mulatta (macaque)      |
| TTGGTGTACATGTGGGTAGAGGGTGT | 1778 Callithrix jacchus (marmoset) |
| TTGGTGTACATGTGGGTACAGGGTGT | 1768 Equus caballus (horse)        |
| TTGGTGTACATGTGGGTACAGGGTGT | 1648 Bos taurus (cow)              |
| TTGGTGTACATGTGGGTACAGGGTGT | 1737 Canis familiaris (dog)        |
| TTGGTGTACTTGTGGGTACAGGGTGT | 1654 Sus scrofa (pig)              |
| TTGGTGTACATGTGGGTACAGGGTGT | 2514 Rattus norvegicus (rat)       |
| TTGGTGTACATGTGGGTACAGGGTGT | 1914 Mus musculus (mouse)          |

**Supplementary Figure S2.** Conservation of miR-10a and -10b target sequences in the 3'UTR region of SFRS1 mRNA in mammals

## SFRS10 3'UTR

```

      uuuaag   u
3'GUG      CC   AGAUG      UCCCAU-5'
  :||      ||   |||||      |||||
TTCATTTAAAAGGTTTTTCTACTGAATCCAGGGTAT 1461 Homo sapiens SFRS10(human)
TTCATTTAAAAGGTTTTTCTACTGAATCCAGGGTAT 1353 Pan troglodytes (chimp)
TTCATTTAAAAGGTTTTTCTACTGAATCCAGGGTAT 1412 Pongo abelii (orangutan)
TTCATTTAAAAGGTTTTTCTACTGAATCCAGGGTAT 1353 Macaca mulatta (macaque)
TTCATTTAAAAGGTTTTTCTACTGAATCCAGGGTA 1254 Callithrix jacchus (marm.)
TTCATTTAAAAGGTTTTTCTACTGAATCCAGGGTAT 1444 Equus caballus (horse)
TTCATTTAAATGGTTTTTCTACTGAATCCAGGGTAT 1326 Bos taurus (cow)
TTCATTTAAAAGGTTTTTCTACTGAATCCAGGGTAT 1740 Canis familiaris (dog)
TTCATTTAAAAGGTTTTTCTACTGAATCCAGGGTAT 1130 Oryctolagus cuniculus(rab.)
TTCATTTAAAAGGTTTTTCTACTGAATCCAGGGTAT 1326 Rattus norvegicus (rat)
TTCATTTAAAAGGTTTTTCTACTGAATCCAGGGTAT 1344 Mus musculus (mouse)

```

```

      uuuaag
3'GUG      CCA   AGAUG      UCCCAU-5'
  |||      |||   |||||      |||||
TTCATTTAAAAGGTTTTTCTACTGAATCCAGGGTAT 1461 Homo sapiens SFRS10(human)
TTCATTTAAAAGGTTTTTCTACTGAATCCAGGGTAT 1353 Pan troglodytes (chimp)
TTCATTTAAAAGGTTTTTCTACTGAATCCAGGGTAT 1412 Pongo abelii (orangutan)
TTCATTTAAAAGGTTTTTCTACTGAATCCAGGGTAT 1353 Macaca mulatta (macaque)
TTCATTTAAAAGGTTTTTCTACTGAATCCAGGGTA 1254 Callithrix jacchus(marm.)
TTCATTTAAAAGGTTTTTCTACTGAATCCAGGGTAT 1444 Equus caballus (horse)
TTCATTTAAATGGTTTTTCTACTGAATCCAGGGTAT 1326 Bos taurus (cow)
TTCATTTAAAAGGTTTTTCTACTGAATCCAGGGTAT 1740 Canis familiaris (dog)
TTCATTTAAAAGGTTTTTCTACTGAATCCAGGGTAT 1130 Oryctolagus cuniculus(rab.)
TTCATTTAAAAGGTTTTTCTACTGAATCCAGGGTAT 1326 Rattus norvegicus (rat)
TTCATTTAAAAGGTTTTTCTACTGAATCCAGGGTAT 1344 Mus musculus (mouse)

```

**Supplementary Figure S3.** Conservation of miR-10a and -10b target sequences in the 3'UTR region of SFRS10 mRNA in mammals
